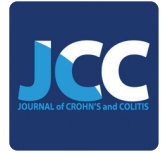

Original Article

# Tuberculosis in Anti-Tumour Necrosis Factor-treated Inflammatory Bowel Disease Patients After the Implementation of Preventive Measures: Compliance With Recommendations and Safety of Retreatment

D. Carpio<sup>a</sup>, A. Jauregui-Amezaga<sup>b</sup>, R. de Francisco<sup>c</sup>, L. de Castro<sup>d</sup>, M. Barreiro-de Acosta<sup>e</sup>, J. L. Mendoza<sup>f</sup>, M. Mañosa<sup>g</sup>, V. Ollero<sup>h</sup>, B. Castro<sup>i</sup>, B. González-Conde<sup>j</sup>, D. Hervías<sup>k</sup>, M. Sierra Ausin<sup>l</sup>, L. Sancho del Val<sup>m</sup>, B. Botella-Mateu<sup>n</sup>, J. Martínez-Cadilla<sup>d</sup>, M. Calvo<sup>o</sup>, M. Chaparro<sup>p,q</sup>, D. Ginard<sup>r</sup>, I. Guerra<sup>s</sup>, N. Maroto<sup>t</sup>, X. Calvet<sup>u</sup>, E. Fernández-Salgado<sup>a</sup>, J. Gordillo<sup>v</sup>, M. Rojas Fera<sup>w</sup> on behalf of GETECCU

<sup>a</sup>Complejo Hospitalario Universitario de Pontevedra. Instituto de Investigación Biomédica Galicia Sur (IBI), Spain  
<sup>b</sup>Hospital Clinic i Provincial, Barcelona, Spain <sup>c</sup>Hospital Central de Asturias, Oviedo, Spain <sup>d</sup>Complejo Hospitalario Universitario, Vigo, Spain <sup>e</sup>Complejo Hospitalario Universitario, Santiago de Compostela, Spain <sup>f</sup>Hospital Clínico, Madrid, Spain <sup>g</sup>Hospital de Badalona, Barcelona, Spain <sup>h</sup>Hospital Universitario Arquitecto Marcide, Ferrol, Spain <sup>i</sup>Hospital Universitario Marqués de Valdecilla, Santander, Spain <sup>j</sup>Complejo Universitario Juan Canalejo, A Coruña, Spain <sup>k</sup>Hospital Virgen de Altagracia, Manzanares, Ciudad Real, Spain <sup>l</sup>Complejo Hospitalario, León, Spain <sup>m</sup>Hospital Río Hortega, Valladolid, Spain <sup>n</sup>Hospital Infanta Cristina de Parla, Madrid, Spain <sup>o</sup>Clínica Puerta de Hierro, Madrid, Spain <sup>p</sup>Servicio de Aparato Digestivo, Hospital Universitario de La Princesa e Instituto de Investigación Sanitaria Princesa (IIS-IP), Madrid, Spain <sup>q</sup>Centro de Investigación Biomédica en Red de Enfermedades Hepáticas y Digestivas (CIBEREHD), Madrid, Spain <sup>r</sup>Hospital Son Espases, Palma de Mallorca, Spain <sup>s</sup>Hospital de Fuenlabrada, Madrid, Spain <sup>t</sup>Hospital de Manises, Valencia, Spain <sup>u</sup>Institut Universitari Parc Taulí, Sabadell, Spain <sup>v</sup>Hospital Santa Creu i Sant Pau, Barcelona, Spain <sup>w</sup>Hospital de Valme, Sevilla, Spain

Corresponding author: Daniel Carpio, MD, Complejo Hospitalario Universitario de Pontevedra, Avda. Mourente s/n, Pontevedra 36071, Spain. Tel: +34-986-80-00-83; Fax: +34-986-80-03-09; Email: [daniel.carpio.lopez@sergas.es](mailto:daniel.carpio.lopez@sergas.es)

## Abstract

**Background and Aims:** Despite having adopted preventive measures, tuberculosis (TB) may still occur in patients with inflammatory bowel disease (IBD) treated with anti-tumour necrosis factor (anti-TNF). Data on the causes and characteristics of TB cases in this scenario are lacking. Our aim was to describe the characteristics of TB in anti-TNF-treated IBD patients after the publication of the Spanish TB prevention guidelines in IBD patients and to evaluate the safety of restarting anti-TNF after a TB diagnosis.

**Methods:** In this multicentre, retrospective, descriptive study, TB cases from Spanish hospitals were collected. Continuous variables were reported as mean and standard deviation or median and interquartile range. Categorical variables were described as absolute and relative frequencies and their confidence intervals when necessary.

**Results:** We collected 50 TB cases in anti-TNF-treated IBD patients, 60% male, median age 37.3 years (interquartile range [IQR] 30.4–47). Median latency between anti-TNF initiation and

first TB symptoms was 155.5 days (IQR 88–301); 34% of TB cases were disseminated and 26% extrapulmonary. In 30 patients (60%), TB cases developed despite compliance with recommended preventive measures; \*not performing 2-step TST (tuberculin skin test) was the main failure in compliance with recommendations. In 17 patients (34%) anti-TNF was restarted after a median of 13 months (IQR 7.1–17.3) and there were no cases of TB reactivation.

**Conclusions:** Tuberculosis could still occur in anti-TNF-treated IBD patients despite compliance with recommended preventive measures. A significant number of cases developed when these recommendations were not followed. Restarting anti-TNF treatment in these patients seems to be safe.

**Key Words:** Anti-TNF; tuberculosis; inflammatory bowel disease; ulcerative colitis; Crohn's disease; infliximab; adalimumab; retreatment; prevention

## 1. Introduction

Tumour necrosis factor- $\alpha$  (TNF- $\alpha$ ) is a pro-inflammatory cytokine that plays an important pathogenic role in inflammatory bowel disease (IBD) and other immune-mediated diseases.<sup>1</sup> Anti-TNF- $\alpha$  (anti-TNF) agents have been used for more than 15 years for the treatment of IBD, both Crohn's disease (CD)<sup>2</sup> and ulcerative colitis (UC).<sup>3</sup> Anti-TNF agents have a favourable safety profile, although a small percentage of patients experience severe adverse effects, including infectious complications.<sup>4</sup>

Soon after infliximab, the first anti-TNF agent, was commercialized in December 1998, these agents were associated with a 2- to 8-fold increased risk of active tuberculosis (TB) compared with the general population.<sup>5–8</sup> TB has also been diagnosed in patients receiving adalimumab<sup>9</sup> and golimumab.<sup>10</sup> Most of these TB cases were diagnosed in the first 4 months after starting anti-TNF therapy, so most of them are considered to be reactivations of latent TB.<sup>5</sup> In more than 50% of TB cases in anti-TNF-treated patients there is extrapulmonary and disseminated disease. This percentage is similar to those observed in immunocompromised patients, more than 50% of cases having extrapulmonary and disseminated disease.<sup>5</sup> The mechanism explaining this increased TB risk is that TNF is a key cytokine in the formation and maintenance of granuloma, an essential mechanism of host defence against intracellular pathogens, like *Mycobacterium tuberculosis*.<sup>11,12</sup>

Since the first reports, different scientific organizations from all over the world have published guidelines and recommendations about active and latent TB screening before anti-TNF treatment.<sup>13–15</sup> In Spain, the Spanish Working Group on Crohn's disease and Ulcerative Colitis (Grupo Español de Trabajo en Enfermedad de Crohn y Colitis Ulcerosa [GETECCU]) published its first guideline in January 2003,<sup>16</sup> updated in 2006.<sup>17</sup>

These screening strategies have lowered the incidence of TB in this population by 78–83%,<sup>18</sup> but TB cases are still being diagnosed despite strictly compliance with these guidelines.<sup>19–21</sup>

The primary objective of this multicentre retrospective study was to analyse the clinical features of TB in anti-TNF-treated IBD patients from Spain after the publication of the GETECCU recommendations, and particularly to evaluate whether these recommendations were accomplished. Secondary objectives were to analyse the course of IBD after TB treatment and to evaluate the safety of restarting anti-TNF after a TB diagnosis.

## 2. Methods

### 2.1. Patients

A multicentre, retrospective, observational study promoted by GETECCU was designed. All GETECCU members were invited to

participate by a structured questionnaire and participating centres were asked to review TB cases registered in their databases. IBD patients under anti-TNF treatment diagnosed with active TB since January 2003 (date of first publication of the GETECCU guidelines) were included and their clinical charts were retrospectively reviewed.

### 2.2. Variables

All clinical and demographic variables were collected after clinical chart review: age, sex, smoking, IBD type (Crohn's disease, ulcerative colitis, unclassified colitis) and subtype according to the Montreal classification, anti-TNF drug (infliximab or adalimumab), corticosteroid or immunosuppressive co-treatment, time between anti-TNF initiation and TB diagnosis, TB clinical characteristics and adherence to the GETECCU guidelines. Follow-up variables included were the clinical course of TB (hospitalization, intensive care unit stay, death), the clinical course of IBD (assessed by Harvey–Bradshaw index and/or physician global assessment) and retreatment with anti-TNF.

### 2.3. Definitions

Latent TB was defined according to the GETECCU guidelines for the prevention of TB in IBD patients starting anti-TNF.<sup>16</sup> These include a thorough review of TB risk factors, a chest X-ray and a two-step tuberculin skin test (TST) performed according to the Mantoux method (TST repeated after 1 week if first test is negative). Patients with risk factors, X-ray findings of remote TB or TST >5 mm were considered to have latent TB and treated with a 9-month regimen of 300 mg/day of isoniazid.

Active TB (TB case definition) was defined according to clinical, radiological and microbiological standards as defined by the Spanish Joint Consensus on diagnostic, treatment and prevention of TB by the Spanish Society of Infectious Diseases and Clinical Microbiology (SEIMC) and the Spanish Society of Pneumology and Thoracic Surgery (SEPAR).<sup>22</sup>

Smoking was defined as more than 7 cigarettes per week; ex-smoker was defined as >12 months with no tobacco consumption.

Corticosteroid treatment was defined as >10 mg/day of prednisone or equivalent for >7 days.

### 2.4. Statistical analysis

Continuous variables were reported as mean and standard deviation when normally distributed and with median and interquartile range when the variables did not follow a normal distribution. Categorical variables were described as absolute number (*n*) and relative frequency (%) and their confidence intervals when necessary. Differences in the median time between the start of anti-TNF and first TB symptom among patients treated with infliximab and adalimumab were analysed using the Wilcoxon rank-sum test. Differences were considered significant if *p* < 0.05.

### 3. Results

#### 3.1. Clinical and demographic characteristics of IBD patients

We collected 57 TB cases in anti-TNF-treated IBD patients from 22 Spanish hospitals. Seven cases were excluded because TB was diagnosed before January 2003. Of the 50 patients included in the analysis population, 30 (60%) were male, with a median age of 37.3 years (interquartile range [IQR] 30.4–47). Thirty-one cases were found in CD patients (62%); infliximab was the anti-TNF used in 41 patients (82%) and most patients were on a standard dose (only 2 patients received higher doses, one with infliximab and another with adalimumab). Forty patients (80%) received concomitant immunosuppressive treatment, mostly thiopurines, and 44% also received corticosteroids along with immunosuppressants. Clinical and demographic characteristics are summarized in Table 1.

#### 3.2. Clinical characteristics of tuberculosis

Only 40% of TB cases were pulmonary forms. Disseminated disease was diagnosed in 34% of patients and extrapulmonary disease in 26% of cases (Table 2).

The most frequent symptoms at presentation of TB were fever, weight loss, respiratory symptoms, enlarged lymph nodes and fatigue (Table 2). As a result of the elevated percentage of extrapulmonary TB disease, many atypical symptoms were found as presenting symptoms (e.g. ascites, abdominal pain, diarrhoea, lingual ulcer, dysphonia, headache). Unexplained fever was the only presenting symptom in 3 patients; in another 6 patients fever and weight loss were the only symptoms reported.

Symptoms of TB developed a median of 155.5 days after the first dose of anti-TNF (IQR 88–301); in 41 cases (82%) TB developed within the first year of treatment (32% within the first 4 months) (Table 2). In the remaining 9 patients, symptoms developed more than 1 year after the start of treatment (more than 3 years later in 5 of them). Median interval between initiation of symptoms and TB diagnosis was 25.5 days (IQR 12–39); however, 6 patients (12%) needed more than 90 days to achieve the diagnosis and in 3 of them (2 pulmonary TB and 1 peritoneal TB) more than 6 months was needed to achieve the correct diagnosis. There was no difference in the median time between the start of anti-TNF and first TB symptom among patients treated with infliximab and adalimumab (148 vs 160 days;  $p = 0.78$ ).

Most patients (82%) had a direct mycobacterial diagnosis, either *M. tuberculosis* detection with Ziehl–Neelsen stain (mostly in sputum, but also in biopsies from different locations), specific Lowenstein culture (mostly from sputum, but also from other body fluids such as urine, blood, ascites or cerebrospinal fluid) or polymerase chain reaction (PCR) analysis of *M. tuberculosis*; in 2 patients the diagnosis was achieved only after performing the last test. In the remaining 9 patients (18%), TB diagnosis was made indirectly by typical chest X-ray pattern, finding of caseating granulomas in biopsies, elevation of adenosine deaminase in body fluids or clinical suspicion and response to empirical anti-tuberculous treatment (Table 2).

Most patients needed hospital admission, with a median stay of 16.5 days (IQR 12–30). Two patients needed intensive care admission and 1 of them died. The patient who died was a 74-year-old woman with UC, treated with infliximab, who developed disseminated TB and died from multi-organ failure.

All patients were treated with isoniazid-based regimens, most of them for 6–12 months. Thirteen patients (26%) developed adverse effects, mainly hepatotoxicity or paradoxical response; 7 of them needed a change in the anti-tuberculosis regimen (Table 2).

#### 3.3. Compliance with Spanish guidelines for prevention of TB

Thirty patients (60%) developed TB despite properly following the Spanish recommendations for prevention, including 5 patients who received TB chemoprophylaxis. In 4 patients, the QuantiFERON-TB Gold-In Tube test was also performed, though this is not included in the guidelines: 2 had a negative result, 1 had an indeterminate result and 1 had a positive result; this was a patient who had also

**Table 1.** Baseline clinical and demographic characteristics of anti-tumour necrosis factor (TNF)-treated inflammatory bowel disease patients with a diagnosis of tuberculosis ( $n = 50$ ).

| Patients' characteristics               | $n$ (%) or median (range) |
|-----------------------------------------|---------------------------|
| Sex                                     |                           |
| Male                                    | 30 (60)                   |
| Female                                  | 20 (40)                   |
| Age, y, median (range)                  | 37.3 (30.4–47)            |
| Smoking                                 |                           |
| Yes                                     | 15 (30)                   |
| No                                      | 29 (58)                   |
| Ex-smoker                               | 6 (12)                    |
| IBD type                                |                           |
| CD                                      | 31 (62)                   |
| UC                                      | 18 (36)                   |
| UCIBD                                   | 1 (2)                     |
| CD Montreal classification ( $n = 31$ ) |                           |
| A1 (<17 y)                              | 3 (9.7)                   |
| A2 (17–40 y)                            | 24 (77.4)                 |
| A3 (>40 y)                              | 4 (12.9)                  |
| B1 (non-stricturing/non-penetrating)    | 16 (51.6)                 |
| B2 (stricturing)                        | 3 (9.7)                   |
| B3 (penetrating)                        | 12 (38.7)                 |
| L1 (ileal)                              | 14 (45.2)                 |
| L2 (colonic)                            | 5 (16.1)                  |
| L3 (ileocolonic)                        | 12 (38.7)                 |
| L4 (superior digestive tract)           |                           |
| Yes                                     | 4 (12.9)                  |
| No                                      | 27 (87.1)                 |
| Perianal                                |                           |
| Yes                                     | 16 (51.6)                 |
| No                                      | 15 (48.4)                 |
| UC Montreal classification ( $n = 18$ ) |                           |
| E1 (distal)                             | 0                         |
| E2 (left-sided)                         | 8 (44.4)                  |
| E3 (extensive)                          | 10 (55.6)                 |
| S1 (mild)                               | 0                         |
| S2 (moderate)                           | 11 (61.1)                 |
| S3 (severe)                             | 7 (38.9)                  |
| Extra-intestinal manifestations*        |                           |
| Yes                                     | 12 (24)                   |
| No                                      | 38 (76)                   |
| Anti-TNF drug                           |                           |
| Infliximab                              | 41 (82)                   |
| Adalimumab                              | 9 (18)                    |
| Co-treatment                            |                           |
| Corticosteroids                         | 26 (52)                   |
| Thiopurines                             | 40 (80)                   |
| Methotrexate                            | 2 (4)                     |
| Anti-TNF + IS + CS                      | 22 (44)                   |

\*Eight patients had articular manifestations; 4 were cutaneous manifestations and 1 patient (in a patient who had also arthropathy) had uveitis.

IBD, inflammatory bowel disease; CD, Crohn's disease; UC, ulcerative colitis; UCIBD, unclassified IBD; IS, immunosuppressants; CS, corticosteroids.

**Table 2.** Clinical characteristics of tuberculosis cases in anti-TNF-treated inflammatory bowel disease patients ( $n = 50$ ).

| Characteristics of TB                                                   | $n$ (%)        |
|-------------------------------------------------------------------------|----------------|
| TB type                                                                 |                |
| Pulmonary                                                               | 20 (40)        |
| Disseminated                                                            | 17 (34)        |
| Other*                                                                  | 13 (26)        |
| Frequency of symptoms                                                   |                |
| Fever                                                                   | 42 (84)        |
| Weight loss                                                             | 28 (56)        |
| Respiratory symptoms                                                    | 33 (66)        |
| Enlarged lymph nodes                                                    | 13 (26)        |
| Days between anti-TNF initiation and first TB symptoms (median and IQR) | 155.5 (88–301) |
| Symptoms $\leq 4$ months                                                | 16 (32)        |
| Symptoms $\leq 12$ months                                               | 41 (82)        |
| Symptoms $> 12$ months                                                  | 9 (18)         |
| Days between TB symptoms and TB diagnosis, median (IQR)                 | 25.5 (12–39)   |
| Diagnostic test                                                         |                |
| Direct mycobacterium detection                                          | 41 (82)        |
| Ziehl–Neelsen stain                                                     | 23 (46)        |
| Lowenstein culture                                                      | 29 (58)        |
| PCR of <i>M. tuberculosis</i> **                                        | 4 (8)          |
| Indirect method                                                         | 9 (18)         |
| Typical radiographic pattern                                            | 3 (6)          |
| Elevated ADA in body fluids***                                          | 3 (6)          |
| Caseating granulomas in biopsy                                          | 1 (2)          |
| Clinical suspicion and response to empirical treatment                  | 2 (4)          |
| Hospital admission                                                      |                |
| YES#                                                                    | 42 (84)        |
| NO                                                                      | 8 (16)         |
| Days of admission, months, median (IQR)                                 | 16.5 (12–30)   |
| Duration of tuberculostatic regimen                                     |                |
| 6                                                                       | 17             |
| 9                                                                       | 20             |
| 12                                                                      | 10             |
| $> 12$                                                                  | 3              |
| Toxicity of tuberculostatic treatment                                   | 13 (26%)       |
| Hepatotoxicity                                                          | 5 (10%)        |
| Neurotoxicity                                                           | 2 (4%)         |
| Paradoxical response                                                    | 4 (8%)         |
| Other****                                                               | 2 (4%)         |

\*Peritoneal (3 patients), pleural (2 patients) and pericardial, renal, urinary tract, meningeal, mediastinum, lingual, laryngeal and unknown origin (1 case each).

\*\*In 2 patients this was the only positive bacteriological method; 2 in broncho-alveolar lavage and other in a kidney biopsy.

\*\*\*Pleural, pericardial, and cerebrospinal.

\*\*\*\*Vomiting, cutaneous allergic reaction.

#Two patients needed intensive care unit admission; 1 of them died.

ADA, adenosine deaminase; IQR, interquartile range; TB, tuberculosis; TNF, tumour necrosis factor.

had a positive TST retest after 1 week. However, in 40% of cases ( $n = 20$ ) lack of compliance with recommendations was detected: in 3 patients TST was not performed and in 13 patients it was not repeated after 1 week; in 4 patients chemoprophylaxis was not administered although it was indicated, including 1 patient who received only 1 month of prophylaxis because of toxicity (Table 3).

Globally, 9 patients (18%) fulfilled the definition of latent TB diagnosis: 5 patients had a recent TB contact (2 of them tested first- or second-step TST-positive) and 4 had a positive TST result. Only

**Table 3.** Compliance with Spanish GETECCU guidelines for tuberculosis prevention in anti-TNF-treated IBD patients (published in January 2003).<sup>16</sup>

|                                                  | Patients<br>$n$ (%) |
|--------------------------------------------------|---------------------|
| Compliance with preventive guidelines            |                     |
| Yes                                              | 30 (60%)            |
| No                                               | 20 (40%)            |
| First TST not done                               | 3 (6%)              |
| Second TST not done*                             | 13 (26%)            |
| Chest X-ray not done                             | 0                   |
| Chemoprophylaxis not administered when indicated | 4 (8%)              |
| TB contact                                       | 2 (4%)              |
| TST positive                                     | 1 (2%)              |
| Incomplete chemoprophylaxis**                    | 1 (2%)              |

\*Second TST after 7 days (if first TST negative).

\*\*Another 5 patients received correct chemoprophylaxis for 6 or 9 months, developing TB anyway.

TB, tuberculosis; TST, tuberculin skin test.

1 patient had a 'positive' chest-X ray with granuloma and apical scarring. In this patient, the second TST and the QuantiFERON test were also positive (Table 4).

### 3.4. Clinical course of IBD after stopping anti-TNF and adding TB treatment

Anti-TNF was stopped in all patients after TB diagnosis. Forty-eight percent of the patients remained on immunosuppressive therapy (22 on thiopurines, 2 on methotrexate); 8 patients (16%) were maintained on 5-aminosalicylic acid (5-ASA) (7 UC and 1 unclassified inflammatory bowel disease (UIBD)), 8 patients (16%) underwent surgical resection (4 UC, 3 CD) and 1 CD patient received budesonide maintenance treatment. Nine patients (18%; 8 CD, 1 UC) remained without any specific treatment after withdrawal of anti-TNF.

After excluding patients who underwent surgery (4 CD and 4 UC) and patients with missing data (3 UC, 1 CD), we collected data on 38 patients (26 CD, 11 UC, 1 unclassified IBD) regarding clinical activity immediately before anti-TNF withdrawal and anti-tuberculous therapy initiation and 6 and 12 months later. We found no statistically significant changes in IBD activity at 6 or 12 months.

### 3.5. Course of TB after anti-TNF retreatment

In 17 patients (34%) anti-TNF was restarted after a median of 13 months (IQR 7.1–17.27); in 5 patients anti-TNF was reintroduced while on TB treatment (at 2.5, 3, 4, 5 and 7 months after initiation of anti-tuberculous treatment) and in the remaining 12 patients anti-TNF retreatment was initiated after the anti-tuberculosis regimen was completed. There were no complications in TB course or cases of TB reactivation after anti-TNF retreatment (median of follow-up 34 months, IQR 23–64.5).

## 4. Discussion

We conducted an observational retrospective study recording 50 TB cases in anti-TNF-treated IBD patients from 22 hospitals in Spain; as far as we know this represents the largest case series reported on this issue. As we excluded TB cases diagnosed before the publication of the Spanish GETECCU recommendations for TB prevention in this group of patients,<sup>16</sup> our results prove that TB cases are still



**Table 4.** Characteristics and treatment of anti-tumour necrosis factor-treated IBD patients with a diagnosis of latent tuberculosis.

| Patient number | Sex/age (y) | TB contact | First TST | Second TST | Chest X ray | QuantiFERON | Latent TB treatment (duration) |
|----------------|-------------|------------|-----------|------------|-------------|-------------|--------------------------------|
| 1              | M 28        | Pos        | Neg       | Neg        | Neg         | ND          | ND                             |
| 2              | F 35        | Pos        | Pos       | ND         | Neg         | ND          | 6 months                       |
| 3              | F 50        | Pos        | Neg       | ND         | Neg         | ND          | ND                             |
| 4              | F 48        | Pos        | Neg       | Neg        | Neg         | ND          | 9 months                       |
| 5              | M 53        | Pos        | Neg       | Pos        | Pos         | Pos         | 6 months                       |
| 6              | M 42        | Neg        | Pos       | ND         | Neg         | ND          | ND                             |
| 7              | M 56        | Neg        | Pos       | ND         | Neg         | ND          | 6 months                       |
| 8              | M 29        | Neg        | Pos       | ND         | Neg         | ND          | 6 months                       |
| 9              | F 70        | Neg        | Pos       | ND         | Neg         | ND          | Incomplete                     |

IBD, inflammatory bowel disease; TB, tuberculosis; TST, tuberculin skin test; Pos, positive; Neg, negative; ND, not done.

happening despite the publication and dissemination of these recommendations. Eleven of these cases have been previously reported separately.<sup>23,24</sup> Other authors have shown that the publication and dissemination of different international and national guidelines and recommendations for TB prophylaxis in anti-TNF-treated patients have lowered the incidence of TB by 80–90%, but have not completely eliminated the risk.<sup>18,25,26</sup> The incidence of TB in Spain has diminished during the last decade; Spain has moved down from an intermediate-incidence country (20 cases/100 000 inhabitants in 2003) to a low-incidence country (13.4/100 000 in 2013), though in some regions and cities the incidence is still over 20 cases/100 000/year.<sup>27,28</sup>

Clinical characteristics of TB in our study mirror those of TB found in immunocompromised patients, 60% of them developing disseminated or extrapulmonary disease, as found in other series.<sup>5,6,29,30</sup> In the general population, only 18% of TB cases represent extrapulmonary forms and only 2% of patients show disseminated disease. As a result, many patients present atypical symptoms and consequently a high grade of clinical suspicion is required to avoid a delay in diagnosis. Special attention must be paid to patients with unexplained fever, with or without weight loss. In our cohort, 12% of patients required more than 3 months to achieve the correct diagnosis. In most patients in our study, TB was diagnosed within the first 12 months after anti-TNF initiation, 33% in the first 3 months, suggesting that these cases are reactivations of latent TB, as also shown by other authors.<sup>5,31</sup> On the other hand, in 9 patients (18%) TB was diagnosed 1 year later (in 5 patients after 3 years), probably reflecting true reinfections. Regarding time to onset of TB, we found no differences between infliximab- and adalimumab-treated patients, as other authors have pointed out.<sup>32,30</sup> It is worth noting that 80% of patients in the present study had received concomitant immunosuppressive therapy and 44% of them had even received triple immunosuppression also with corticosteroids. Immunosuppressive therapies have shown an increased risk of TB when administered as monotherapy,<sup>33</sup> and a recent systematic review has demonstrated a 13-fold increased risk of TB in patients on combined therapy compared with anti-TNF monotherapy.<sup>34</sup> Thus, more intensive TB screening (i.e. both the TST and the interferon- $\gamma$  release assay [IGRA]) and a surveillance programme should be advised in these patients.

In 40% of the patients the recommended screening procedures were not fulfilled; in most of them the 2-step TST was not performed, or TB prophylaxis was not administered when required. In a recent cross-sectional survey carried out in 915 high-volume anti-TNF prescribers from the European Union, only 73–80% of gastroenterologists followed TB screening guidelines.<sup>35</sup> Defective screening

procedures have also been reported by other authors in up to 80% of TB cases,<sup>8,29,36</sup> increasing the risk of TB 7-fold compared with patients undergoing appropriate screening and prophylaxis recommendations.<sup>31</sup> In these studies, not performing 2-step TST was also the main factor contributing to low compliance with recommendations. This problem of adherence to the guidelines indicates that a greater effort to disseminate national recommendations should be made in order to prevent almost half of TB cases. The repeated supply of reinforcing information by product manufacturers<sup>35</sup> or the inclusion of a TB screening checklist before prescribing anti-TNF<sup>37</sup> may enhance adherence to screening recommendations.

Excluding these 20 patients who had not correctly followed the recommendations, we still report 30 cases of patients who developed TB despite strict compliance with all recommendations. As far as we are aware, this is the largest study reporting this issue in IBD patients. Other authors have previously published case reports<sup>9,21,38,39</sup> and case series<sup>20,26,31,40–42</sup> both in IBD and other immune-mediated diseases. Though the French multidisciplinary RATIO registry collected 69 cases, only 9 patients (13%) had IBD.<sup>2</sup>

There are several possible explanations for the failure of preventive measures. First, though TST has been widely used for over a century for the diagnosis of latent TB, its specificity and sensitivity are low, especially in immunocompromised patients.<sup>43</sup> Some authors have emphasized the limitations of the TST in IBD patients because of their high rates of anergy, specially when treated with corticosteroids or immunosuppressive medication.<sup>44</sup> Using a more stringent cut-off of <5 mm in the TST, the sensitivity of the test would have increased and would have detected more patients with latent TB, as many of the reported cases happened in patients with TST indurations between 5 and 9 mm.<sup>29,45–48</sup> Also, using a two-step TST may increase the sensitivity of the test by 8–14%.<sup>31,49</sup> In recent years the IGRA (as the QuantiFERON-TB Gold In-Tube [QFT-GIT; Cellestis, Carnegie, VIC, Australia] and T-SPOT.TB [T-SPOT; Oxford Immunotec, Abingdon, UK]) has been popularized and is becoming more frequently used for latent TB diagnosis<sup>50,51</sup> because of its higher specificity<sup>52</sup> and sensitivity, especially in immunocompromised hosts.<sup>53–56</sup> Some national guidelines recommend using the IGRA instead of the TST for screening for latent TB before anti-TNF treatment;<sup>57</sup> others recommend using both the TST and the IGRA, whether concomitantly or consecutively.<sup>51,58, 61–64</sup> However, although the IGRA has higher specificity and probably better sensitivity for the detection of latent TB,<sup>64,65</sup> it still has some limitations in immunosuppressed patients, with a non-negligible rate of indeterminate results.<sup>53,66,67</sup> In our series, 2 patients had a negative QuantiFERON Gold In-Tube result and another 1 had an indeterminate result; other

authors have also reported TB cases in spite of a negative IGRA result.<sup>47,68,69</sup>

Second, treatment of latent TB is not fully efficacious, mainly because fewer than 80% of patients complete the treatment.<sup>70</sup> In our study, we report 5 patients who developed TB despite receiving chemoprophylaxis (4 patients received a 6-month course and 1 received a 9-month course); in another patient, treatment for latent TB was incomplete because of intolerance. In a retrospective study performed in rheumatology patients, 11 out of 45 patients developed TB, 7 of them despite having received complete latent TB treatment; the remaining 4 cases either refused to take the treatment or stopped it due to hepatotoxicity.<sup>71</sup> Other authors have also reported TB chemoprophylaxis failure,<sup>19,34,39,41,46,47</sup> most of them using 6-month isoniazid courses or incomplete treatments because of adverse effects. Randomized clinical trials and a recent network meta-analysis<sup>72</sup> have shown that completing a 9-month course of isoniazid provides nearly 90% protection against developing TB, while protection falls to around 60% when a 6-month course is used.<sup>73,74</sup> Thus, we suggest that in this group of patients latent TB treatment should be extended for at least 9 months, changing the regimen if isoniazid toxicity occurs. There is also the possibility that some patients were infected with an isoniazid-resistant strain. In recent years, isoniazid-rifamycin short-course regimens for the treatment of latent TB have been recommended.<sup>15</sup> Although this regimen could overcome isoniazid resistance, TB cases in patients treated with these regimen have also been described.<sup>71</sup>

Third, more attention has to be paid to medical history and TB risk factors, including being born or having travelled to endemic areas, recent or past TB contacts, and being an institutionalized patient.<sup>69</sup> In the RATIO registry, patients born in an endemic area had a 10.3-fold higher risk of developing TB.<sup>29</sup> The British Thoracic Society recommendations include clinical risk stratification for choosing patients as candidates for prophylaxis.<sup>15</sup>

Finally, new infection during long-term anti-TNF treatment may still occur. In the present study, 18% of cases were diagnosed later than 1 year after anti-TNF initiation, as reported by other authors.<sup>20,29,71</sup> To minimize this problem, some authors advocate repeating TST or IGRA tests annually for patients in long-term anti-TNF treatment.<sup>68,75,76</sup>

Although different guidelines state that restarting anti-TNF in patients who are diagnosed with TB is safe,<sup>48,77–79</sup> data analysing this issue are scarce.<sup>29,47,80,81</sup> In the RATIO registry,<sup>29</sup> 2/69 cases maintained anti-TNF while antituberculous treatment was administered and another 8 patients restarted anti-TNF after a median of 5.8 months. None of them had a recurrence of TB. In a Korean study, 8 patients were re-administered anti-TNF without reporting TB recurrence.<sup>47</sup> In a Greek report,<sup>82</sup> 3 out of 5 patients with TB were restarted on anti-TNF, all of them after completion of antituberculous treatment, without evidence of TB reactivation. There is only 1 reported case of TB reactivation in this situation; Masiá et al.<sup>83</sup> described a case of TB reactivation 11 months after resumption of anti-TNF in a 19-year-old CD patient. In our study 17 patients were restarted on anti-TNF after TB diagnosis, 5 of them while still receiving antituberculous treatment. To the best of our knowledge, this is the largest series reporting anti-TNF resumption after TB diagnosis. We found no cases of TB recurrence or worsening; therefore, our data support the concept that restarting anti-TNF after antituberculous treatment has been initiated is safe.

The present study has several limitations, mainly because of its retrospective nature and voluntary participation. Also, we did not include in the analysis ethnicity or other comorbidities influencing

the risk of TB, such as diabetes or chronic renal failure. On the other hand, this is the largest study reporting TB cases in anti-TNF-treated IBD patients and the largest series studying the resumption of anti-TNF in patients with a TB diagnosis. Also, the study includes only TB cases in IBD patients after the publication of preventive guidelines, making the population included more homogeneous than those in previous studies.

In conclusion, TB remains an important problem in anti-TNF-treated patients despite the adoption of preventive measures, especially in countries with moderate or high prevalence of TB. As almost half of the cases occur because of failure to adhere to the guidelines, greater effort in disseminating national and international recommendations for TB prevention is needed. Also, guidelines should be improved to minimize TB risk in this population, the effectiveness of measures such as increasing TST sensitivity and including IGRA in the evaluation of latent TB and lengthening its treatment remains to be proved. Retreatment with anti-TNF after a TB diagnosis seems to be safe.

## Funding

No specific funding has been received

## Conflict of Interest

The authors have no conflict of interest to declare regarding this paper.

## Author Contributions

D. Carpio designed the study, collected, analysed and interpreted the data and wrote the paper. M. Barreiro-de-Acosta, M. Chaparro, D. Ginard and X. Calvet reviewed the draft and made important contributions to the final manuscript. All authors collected data and reviewed and approved the final version of the manuscript.

## References

1. Van Deventer S. Review article: targeting TNF alpha as a key cytokine in the inflammatory processes of Crohn's disease – the mechanisms of action of infliximab. *Alim Pharmacol Ther* 1999;13 Suppl 4:3–8.
2. Stidham RW, Lee TCH, Higgins PDR, et al. Systematic review with network meta-analysis: the efficacy of anti-TNF agents for the treatment of Crohn's disease. *Alim Pharmacol Ther* 2014;39:1349–62.
3. Stidham RW, Lee TCH, Higgins PDR, et al. Systematic review with network meta-analysis: the efficacy of anti-tumour necrosis factor-alpha agents for the treatment of ulcerative colitis. *Alim Pharmacol Ther* 2014;39:660–71.
4. van Assche G, Lewis JD, Lichtenstein GR, et al. The London Position Statement of the World Congress of Gastroenterology on Biological Therapy for IBD With the European Crohn's and Colitis Organisation: safety. *Am J Gastroenterol* 2011;106:1594–602.
5. Keane J, Gershon S, Wise RP, et al. Tuberculosis associated with infliximab, a tumor necrosis factor alpha-neutralizing agent. *N Engl J Med* 2001;345:1098–104.
6. Gómez-Reino JJ, Carmona L, Valverde VRG, Mola EMN, Montero MD, on behalf of the BIOBADASER group. Treatment of rheumatoid arthritis with tumor necrosis factor inhibitors may predispose to significant increase in tuberculosis risk: a multicenter active-surveillance report. *Arthritis Rheum* 2003;48:2122–7.
7. Souto A, Maneiro JR, Salgado E, Carmona L, Gomez-Reino JJ. Risk of tuberculosis in patients with chronic immune-mediated inflammatory diseases treated with biologics and tofacitinib: a systematic review and meta-analysis of randomized controlled trials and long-term extension studies. *Rheumatology* 2014;53:1872–85.

8. Cantini F, Niccoli L, Goletti D. Adalimumab, etanercept, infliximab, and the risk of tuberculosis: data from clinical trials, national registries, and postmarketing surveillance. *J Rheumatol Suppl* 2014;**91**:47–55.
9. Malipiedi AS, Rajendran R, Kallarakal G. Disseminated tuberculosis after anti-TNF $\alpha$  treatment. *Lancet* 2007;**369**:162.
10. Kay J, Fleischmann R, Keystone E, et al. Golimumab 3-year safety update: an analysis of pooled data from the long-term extensions of randomised, double-blind, placebo-controlled trials conducted in patients with rheumatoid arthritis, psoriatic arthritis or ankylosing spondylitis. *Ann Rheum Dis* 2013;**74**:538–46.
11. Tufariello JM, Chan J, Flynn JL. Latent tuberculosis: mechanisms of host and bacillus that contribute to persistent infection. *Lancet Infect Dis* 2003;**3**:578–90.
12. Algood HMS, Lin PL, Flynn JL. Tumor necrosis factor and chemokine interactions in the formation and maintenance of granulomas in tuberculosis. *Clin Infect Dis* 2005;**41** Suppl 3:S189–93.
13. Furst DE, Cush J, Kaufmann S, Siegel J, Kurth R. Preliminary guidelines for diagnosing and treating tuberculosis in patients with rheumatoid arthritis in immunosuppressive trials or being treated with biological agents. *Ann Rheum Dis* 2002;**61** Suppl II:i62–3.
14. Salmon D, GTI and AFSSAPS. Groupe Tuberculose et infliximab. Agence Française de Sécurité Sanitaire de Produits de Santé. Recommendations about the prevention and management of tuberculosis in patients taking infliximab. *Joint Bone Spine* 2002;**69**:170–2.
15. British Thoracic Society Standards of Care Committee. BTS recommendations for assessing risk and for managing *Mycobacterium tuberculosis* infection and disease in patients due to start anti-TNF- treatment. *Thorax* 2005;**60**:800–5.
16. Obrador A, López San Román A, Muñoz P, Fortún J, Gassull MA. [Consensus guideline on tuberculosis and treatment of inflammatory bowel disease with infliximab. Spanish Working Group on Crohn Disease and Ulcerative Colitis]. *Gastroenterol Hepatol* 2002;**26**:29–33.
17. López-San Román A, Obrador A, Fortún J, Muñoz P, Gassull MA, Grupo Espanol de Trabajo en Enfermedad de Crohn y Colitis Ulcerosa (GETECCU). [Recommendations on tuberculosis and treatment of inflammatory bowel disease with infliximab.2006 update]. *Gastroenterol Hepatol* 2006;**29**:81–4.
18. Carmona L, Gómez-Reino JJ, Rodríguez-Valverde V, et al. Effectiveness of recommendations to prevent reactivation of latent tuberculosis infection in patients treated with tumor necrosis factor antagonists. 2005;**52**:1766–72.
19. Parra Ruiz J, Ortego Centeno N, Raya Alvarez E. Development of tuberculosis in a patient treated with infliximab who had received prophylactic therapy with isoniazid. *J Rheumatol* 2008;**30**:1657–8.
20. Abreu C, Magro F, Santos-Antunes J, et al. Tuberculosis in anti-TNF- $\alpha$  treated patients remains a problem in countries with an intermediate incidence: analysis of 25 patients matched with a control population. *J Crohns Colitis* 2013;**7**:e486–92.
21. Debeuckelaere C, De Munter P, Van Bleyenbergh P, et al. Tuberculosis infection following anti-TNF therapy in inflammatory bowel disease, despite negative screening. *J Crohns Colitis* 2013;**8**:550–7.
22. González-Martín J, García-García JM, et al. Documento de consenso sobre diagnóstico, tratamiento y prevención de la tuberculosis. *Enferm Infecc Microbiol Clín* 2010;**28**:297.e1–297.e20.
23. Jauregui-Amezaga A, Turon F, Ordás I, et al. Risk of developing tuberculosis under anti-TNF treatment despite latent infection screening. *J Crohns Colitis* 2013;**7**:208–12.
24. Mañosa M, Domènech E, Cabré E. Current incidence of active tuberculosis in IBD patients treated with anti-TNF agents: still room for improvement. *J Crohns Colitis* 2013;**7**:e499–e500.
25. Takeuchi T, Tatsuki Y, Nogami Y, et al. Postmarketing surveillance of the safety profile of infliximab in 5000 Japanese patients with rheumatoid arthritis. *Ann Rheum Dis* 2008;**67**:189–94.
26. Arkema EV, Jonsson J, Baeklund E, et al. Are patients with rheumatoid arthritis still at an increased risk of tuberculosis and what is the role of biological treatments? *Ann Rheum Dis* 2015;**74**:1212–7.
27. Instituto de Epidemiología de Salud Carlos III. *Informe epidemiológico sobre la situación de la tuberculosis en España. Año 2013*. Madrid, 2014.
28. de Vries G, Aldridge RW, Cayla JA, et al. Epidemiology of tuberculosis in big cities of the European Union and European Economic Area countries. *Euro Surveill* 2014;**19**(9):pii=20726.
29. Tubach F, Salmon D, Ravaud P, et al. Risk of tuberculosis is higher with anti-tumor necrosis factor monoclonal antibody therapy than with soluble tumor necrosis factor receptor therapy: the three-year prospective French research axed on tolerance of biotherapies registry. *Arthritis Rheum* 2009;**60**:1884–94.
30. Dixon WG, Hyrich KL, Watson KD, et al. Drug-specific risk of tuberculosis in patients with rheumatoid arthritis treated with anti-TNF therapy: results from the British Society for Rheumatology Biologics Register (BSRBR). *Ann Rheum Dis* 2010;**69**:522–8.
31. Gómez-Reino JJ, Carmona L, Ángel Descalzo M, BIOBADASER Group. Risk of tuberculosis in patients treated with tumor necrosis factor antagonists due to incomplete prevention of reactivation of latent infection. *Arthritis Rheum* 2007;**57**:756–61.
32. Wallis RS, Broder MS, Wong JY, Hanson ME, Beenhouwer DO. Granulomatous infectious diseases associated with tumor necrosis factor antagonists. *Clin Infect Dis* 2004;**38**:1261–5.
33. Abera FN, Stettler N, Brensinger C, Lichtenstein GR, Lewis JD. Risk for active tuberculosis in inflammatory bowel disease patients. *Clin Gastroenterol Hepatol* 2007;**5**:1070–1.
34. Lorenzetti R, Zullo A, Ridola L, et al. Higher risk of tuberculosis reactivation when anti-TNF is combined with immunosuppressive agents: a systematic review of randomized controlled trials. *Ann Med* 2014;**46**:547–54.
35. Smith MY, Attig B, McNamee L, Eagle T. Tuberculosis screening in prescribers of anti-tumor necrosis factor therapy in the European Union. *Int J Tuberc Lung Dis* 2012;**16**:1168–73.
36. Vaughn BP, Doherty GA, Gautam S, Moss AC, Cheifetz AS. Screening for tuberculosis and hepatitis B prior to the initiation of anti-tumor necrosis therapy. *Inflamm Bowel Dis* 2012;**18**:1057–63.
37. Cabriada JL, Vera I, Domènech E, et al. Recomendaciones del Grupo Español de Trabajo en Enfermedad de Crohn y Colitis Ulcerosa sobre el uso de fármacos antifactor de necrosis tumoral  $\alpha$  en la enfermedad inflamatoria intestinal (2013). *Gastroenterol Hepatol* 2014;**36**:127–46.
38. Fidler H, Schnitzler F, Ferrante M, et al. Long-term safety of infliximab for the treatment of inflammatory bowel disease: a single-centre cohort study. *Gut* 2009;**58**:501–8.
39. Caldera F, Grimes I, Soni A. Reactivation of latent tuberculosis in a Crohn's patient after TB prophylaxis treated with adalimumab. *Am J Gastroenterol* 2013;**108**:1181–2.
40. Hofland RW, Thijsen SFT, Verhagen MAMT, Schenk Y, Bossink AWJ. Tuberculosis during TNF-inhibitor therapy, despite screening. *Thorax* 2013;**68**:1079–80.
41. Kwon M, Sung M, Kwon Y-J, et al. Active tuberculosis risk with tumor necrosis factor inhibitors after treating latent tuberculosis. *J Clin Rheumatol* 2014;**20**:68–73.
42. Winthrop K, Baxter R, Liu L, et al. Mycobacterial diseases and antitumour necrosis factor therapy in USA. *Ann Rheum Dis* 2012;**72**:37–42.
43. Gardam MA, Keystone EC, Menzies R, et al. Anti-tumour necrosis factor agents and tuberculosis risk: mechanisms of action and clinical management. *Lancet Infect Dis* 2003;**3**:148–55.
44. Mow WS, Abreu-Martin MT, Papadakis KA, Pitchon HE, Targan SR, Vasilias EA. High incidence of anergy in inflammatory bowel disease patients limits the usefulness of PPD screening before infliximab therapy. *Clin Gastroenterol Hepatol* 2004;**2**:309–13.
45. Fonseca JE, Canhão H, Silva C, Miguel C. [Tuberculosis in rheumatic patients treated with tumour necrosis factor alpha antagonists: the Portuguese experience]. *Acta Reumatol Port* 2006;**31**:247–53.
46. Burmester GR, Mariette X, Montecucco C, et al. Adalimumab alone and in combination with disease-modifying antirheumatic drugs for the treatment of rheumatoid arthritis in clinical practice: the Research in Active Rheumatoid Arthritis (ReAct) trial. *Ann Rheum Dis* 2007;**66**:732–9.

47. Suh YS, Kwok S-K, Ju JH, Park K-S, Park S-H, Yoon C-H. Safe re-administration of tumor necrosis factor- $\alpha$  (TNF $\alpha$ ) inhibitors in patients with rheumatoid arthritis or ankylosing spondylitis who developed active tuberculosis on previous anti-TNF $\alpha$  therapy. *J Korean Med Sci* 2014;29:38.
48. Rahier JF, Magro F, Abreu C, et al. Second European evidence-based consensus on the prevention, diagnosis and management of opportunistic infections in inflammatory bowel disease. *J Crohns Colitis*. 2014;8:443–68.
49. Zabana Y, Domènech E, San Román AL, et al. Tuberculous chemoprophylaxis requirements and safety in inflammatory bowel disease patients prior to anti-TNF therapy. *Inflamm Bowel Dis* 2008;14:1387–91.
50. Lalvani A, Millington KA. Screening for tuberculosis infection prior to initiation of anti-TNF therapy. *Autoimmun Rev* 2008;8:147–52.
51. Mazurek GH, Jereb J, Vernon A, et al. Updated guidelines for using interferon gamma release assays to detect *Mycobacterium tuberculosis* infection - United States, 2010. *MMWR Recomm Rep* 2010;59:1–25.
52. Menzies D, Pai M, Comstock G. Meta-analysis: new tests for the diagnosis of latent tuberculosis infection: areas of uncertainty and recommendations for research. *Ann Intern Med* 2007;146:340–54.
53. Matulis G, Juni P, Villiger PM, Gadola SD. Detection of latent tuberculosis in immunosuppressed patients with autoimmune diseases: performance of a *Mycobacterium tuberculosis* antigen-specific interferon assay. *Ann Rheum Dis* 2008;67:84–90.
54. Piana F. Use of a T-cell-based test for detection of tuberculosis infection among immunocompromised patients. *Eur Resp J* 2006;28:31–4.
55. Schoepfer AM, Flogerzi B, Fallegger S, et al. Comparison of interferon-gamma release assay versus tuberculin skin test for tuberculosis screening in inflammatory bowel disease. *Am J Gastroenterol* 2008;103:2799–806.
56. Hsia EC, Schluger N, Cush JJ, et al. Interferon- $\gamma$  release assay versus tuberculin skin test prior to treatment with golimumab, a human anti-tumor necrosis factor antibody, in patients with rheumatoid arthritis, psoriatic arthritis, or ankylosing spondylitis. *Arthritis Rheum* 2012;64:2068–77.
57. Beglinger C, Dudler J, Mottet C, et al. Screening for tuberculosis infection before the initiation of an anti-TNF- $\alpha$  therapy. *Swiss Med Wkly* 2007;137:620–2.
58. Chen D-Y, Shen G-H, Hsieh T-Y, Hsieh C-W, Lan J-L. Effectiveness of the combination of a whole-blood interferon-gamma assay and the tuberculin skin test in detecting latent tuberculosis infection in rheumatoid arthritis patients receiving adalimumab therapy. *Arthritis Rheum* 2008;59:800–6.
59. Abubakar I, Griffiths C, Ormerod P, on behalf of the Guideline Development Group. Diagnosis of active and latent tuberculosis: summary of NICE guidance. *BMJ* 2012;345:e6828–8.
60. Singanayagam A, Manalan K, Sridhar S, et al. Evaluation of screening methods for identification of patients with chronic rheumatological disease requiring tuberculosis chemoprophylaxis prior to commencement of TNF- $\alpha$  antagonist therapy. *Thorax* 2013;68:955–61.
61. Chebli J, Gaburri PD, Chebli LA. A guide to preparation of patients with inflammatory bowel diseases for anti-TNF- $\alpha$  therapy. *Med Sci Monit* 2014;20:487–98.
62. Jung YJ, Lee JY, Jo K-W, et al. The 'either test positive' strategy for latent tuberculosis infection before anti-tumour necrosis factor treatment. *Int J Tuberc Lung Dis* 2014;18:428–34.
63. Kim H-C, Jo K-W, Jung YJ, et al. Diagnosis of latent tuberculosis infection before initiation of anti-tumor necrosis factor therapy using both tuberculin skin test and QuantiFERON-TB Gold In Tube assay. *Scand J Infect Dis* 2014;46:1–7.
64. Kleinert S, Tony HP, Krueger K, et al. Screening for latent tuberculosis infection: performance of tuberculin skin test and interferon-release assays under real-life conditions. *Ann Rheum Dis* 2012;71:1791–5.
65. Arias-Guillén M, Riestra S, de Francisco R, et al. T-Cell Profiling and the Immunodiagnosis of latent tuberculosis infection in patients with inflammatory bowel disease. *Inflamm Bowel Dis* 2014;20:329–38.
66. Shahidi N, Fu Y-TN, Qian H, Bressler B. Performance of interferon-gamma release assays in patients with inflammatory bowel disease: a systematic review and meta-analysis. *Inflamm Bowel Dis* 2012;18:2034–42.
67. Helwig U, Müller M, Hedderich J, Schreiber S. Corticosteroids and immunosuppressive therapy influence the result of QuantiFERON TB Gold testing in inflammatory bowel disease patients. *J Crohns Colitis* 2012;6:419–24.
68. Chen DY, Shen GH, Chen YM, Chen HH, Hsieh CW, Lan JL. Biphasic emergence of active tuberculosis in rheumatoid arthritis patients receiving TNF inhibitors: the utility of IFN assay. *Ann Rheum Dis* 2011;71:231–7.
69. Qumseya BJ, Ananthakrishnan AN, Skaros S, et al. QuantiFERON TB gold testing for tuberculosis screening in an inflammatory bowel disease cohort in the United States. *Inflamm Bowel Dis* 2011;17:77–83.
70. Anibarro L, Casas S, Paz-Esquete J, et al. Treatment completion in latent tuberculosis infection at specialist tuberculosis units in Spain. *Int J Tuberc Lung Dis* 2010;14:701–7.
71. Sichletidis L, Settas L, Spyrtos D, Chloros D, Patakas D. Tuberculosis in patients receiving anti-TNF agents despite chemoprophylaxis. *Int J Tuberc Lung Dis* 2006;10:1127–32.
72. Stagg HR, Zenner D, Harris RJ, Muñoz L, Lipman MC, Abubakar I. Treatment of latent tuberculosis infection. *Ann Intern Med* 2014;161:419.
73. Smieja MJ, Marchetti CA, Cook DJ, Smail FM. Isoniazid for preventing tuberculosis in non-HIV infected persons. *Cochrane Database Syst Rev* 2000;(2):CD001363.
74. American Thoracic Society Official Statement. Targeted tuberculin testing and treatment of latent tuberculosis infection. *Am J Resp Crit Care Med* 2000;Suppl 3:S221–47.
75. Papay P, Primas C, Eser A, et al. Retesting for latent tuberculosis in patients with inflammatory bowel disease treated with TNF- $\alpha$  inhibitors. *Alim Pharmacol Ther* 2012;36:858–65.
76. Hatzara C, Hadziyannis E, Kandili A, et al. Frequent conversion of tuberculosis screening tests during anti-tumour necrosis factor therapy in patients with rheumatic diseases. *Ann Rheum Dis* 2015;74:1848–53.
77. Singh JA, Furst DE, Bharat A, et al. 2012 Update of the 2008 American College of Rheumatology recommendations for the use of disease-modifying antirheumatic drugs and biologic agents in the treatment of rheumatoid arthritis. *Arthritis Care Res* 2012;64:625–39.
78. Solovic I, Sester M, Gomez-Reino JJ, et al. The risk of tuberculosis related to tumour necrosis factor antagonist therapies: a TBNET consensus statement. *Eur Resp J* 2010;36:1185–206.
79. Cantini F, Prignano F, Goletti D. Restarting biologics and management of patients with flares of inflammatory rheumatic disorders or psoriasis during active tuberculosis treatment. *J Rheumatol Suppl* 2014;91:78–82.
80. Matsumoto T, Tanaka T, Kawase I. Infliximab for rheumatoid arthritis in a patient with tuberculosis. *N Engl J Med* 2006;355:740–1.
81. Kemta Lekpa F, Marini-Portugal A, Lesprit P, Chevalier X, Claudepierre P. Safe re-initiation of infliximab in a patient with renal tuberculosis. *Clin Exp Rheumatol* 2009;27:534.
82. Aslanidis S, Pyrpasopoulou A, Douma S, Petidis K. Is it safe to readminister tumor necrosis factor  $\alpha$  antagonists following tuberculosis flare? *Arthritis Rheum* 2007;58:327–8.
83. Masiá M, Martínez M, García-Sepulcre MF, Sáez J, Gutiérrez F. Recurrence of active tuberculosis following resumption of anti-TNF- $\alpha$  therapy in a patient with Crohn's disease. *Int J Tuberc Lung Dis* 2014;18:249–50.
